# Supplementary material for: Intracranial haemorrhage detected by cerebral computed tomography after falls in hospital acute medical wards
Source: Springer Nature journal article supplement (doi:10.1186/s12913-019-4634-8), 2019-11-04
Supplement: MOESM1 [file 17347708]

IDENTITY

# MonashHealth

Affix Patient Identification Label

- Dandenong Hospital
- Kingston Centre
- Jessie McPherson
- Casey Hospital
- Monash Medical Centre Clayton
- Moorabbin Hospital
- Community Health Services
- Cranbourne Integrated Care Centre

Unit Record Number: \_\_\_\_\_  
 Surname: \_\_\_\_\_  
 Given Name: \_\_\_\_\_  
 D.O.B: \_\_\_\_\_ Age: \_\_\_\_\_ Sex: \_\_\_\_\_  
 Address: \_\_\_\_\_  
 \_\_\_\_\_

## POST FALL MANAGEMENT FORM

Post Fall Management Form to be used for **ALL Falls**.  
 This post fall management plan should not replace clinical judgement.  
**To be used in conjunction with the post fall management procedure.**  
 \* Page 1 to be completed by nursing  
 \* Page 2, 3 & 4 (part A) to be completed by medical  
 \* Page 4 (part B) to be completed by interdisciplinary

### PART A: Undertake investigations as clinically indicated by their injuries or fall mechanisms.

Site: \_\_\_\_\_ Ward: \_\_\_\_\_ Date of fall: \_\_\_\_\_ Time of fall: \_\_\_\_\_  
 Time patient found: \_\_\_\_\_ Time medical notified: \_\_\_\_\_ Date of medical review: \_\_\_\_\_ Time of medical review: \_\_\_\_\_

**Please circle**  
**DETAILS OF THE FALL**  
 Witnessed / Unwitnessed \_\_\_\_\_  
 If witnessed, witnessed by \_\_\_\_\_  
 Head strike: YES / NO / SUSPECTED / UNSURE \_\_\_\_\_  
 LOC: YES / NO How long? \_\_\_\_\_  
 Where did the fall occur? \_\_\_\_\_  
 Type of fall: Slip / Trip / Bumped into object / fall onto object / Transfer/other (specify) \_\_\_\_\_  
 Activity being undertaken \_\_\_\_\_  
 Position of patient \_\_\_\_\_  
 Patient recall of fall \_\_\_\_\_

**INTERVENTIONS IN PLACE IMMEDIATELY PRIOR TO FALL**

|                                              |                       |
|----------------------------------------------|-----------------------|
| Patient able to follow instructions          | YES / NO              |
| Instructions on calling nurse prior to fall? | YES / NO              |
| Call bell within reach                       | YES / NO / NA         |
| Brakes on bed                                | YES / NO / NA         |
| Bedrails                                     | UP / DOWN / NA        |
| LoLo bed position at time of fall            | UP / DOWN / PART / NA |
| Bed/chair at suitable height                 | YES / NO / NA         |
| Chair stable                                 | YES / NO / NA         |
| Bedside table within reach                   | YES / NO / NA         |
| Gait aid within reach                        | YES / NO / NA         |
| Eyewear in use or within reach               | YES / NO / NA         |
| Personal items within reach                  | YES / NO / NA         |
| Appropriate footwear                         | YES / NO              |
| Appropriate clothing                         | YES / NO              |
| Assisted with ambulation/transfers           | YES / NO / NA         |
| Adequate nutrition & hydration               | YES / NO              |
| Family member present                        | YES / NO              |

**PATIENT**  
 Alert/Orientated/Confused/Agitated/Impulsive/Other (specify) \_\_\_\_\_  
 Does the patient lack insight in their risk of falling: YES / NO \_\_\_\_\_  
 Last toileted at: \_\_\_\_\_  
 Was the patient incontinent at the time of the fall? YES / NO \_\_\_\_\_  
 Was the patient wanting to go to the toilet at the time of the fall? YES / NO \_\_\_\_\_  
 Restraints in use at time of fall? YES / NO \_\_\_\_\_  
 Specify restraints used \_\_\_\_\_  
 Any changes in medication in the past 24 hours? YES / NO. If yes, what changes \_\_\_\_\_

**ENVIRONMENT**

|                                       |                                                                              |
|---------------------------------------|------------------------------------------------------------------------------|
| Room sufficiently well lit            | YES / NO                                                                     |
| Floor hazards (e.g. wet, slippery)    | YES / NO                                                                     |
| Room free from clutter                | YES / NO                                                                     |
| Visibility of patient at time of fall | VISIBLE / NOT VISIBLE / DOOR CLOSED / CURTAINS DRAWN / OTHER (specify) _____ |

**FALLS RISK ASSESSMENT (prior to fall)**  
**LOW MEDIUM HIGH**  
**Date last completed:**  
 Riskman entered. Riskman ID No. \_\_\_\_\_

**Are there any injuries sustained? YES / NO / SUSPECTED**  
**Specify injuries sustained or suspected** \_\_\_\_\_  
**Were all documented prevention strategies (as per MRI33) in place at the time of the fall? YES / NO**  
**If identified strategies were not in place, list these below.**

Other information (include contributing factors to the fall):  
 \_\_\_\_\_  
 \_\_\_\_\_  
 \_\_\_\_\_  
 \_\_\_\_\_

Print name: \_\_\_\_\_ Signature: \_\_\_\_\_ Designation: \_\_\_\_\_ Date & time: \_\_\_\_\_

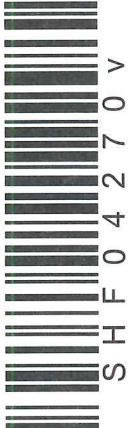

SITUATION

POST FALL MANAGEMENT

MRI72(i)

**MEDICAL REVIEW POST FALL IS MANDATORY**

The timing of the review depends on the clinical situation:

- If there is a decrease of  $\geq 2$  on the Glasgow Coma Scale the medical review must occur immediately and a MET called.
- If injuries are obvious or suspected, or the patient is at increased risk of bleeding, medical review must occur within an hour
- All other patients must be reviewed within 4 hours

Medical Officer (print name & pager):

Date & Time of review:

LOC: Y/N      Unwitnessed: Y/N      Delirium: Y/N      Dementia: Y/N      Toilet related: Y/N

Amnesia and duration:

**Confirm circumstances of the fall** (as documented on page 1 and with discussion with nurse) and document any variations or additional information.

**BACKGROUND**

**Increased bleeding risk:**

Do any of the following apply to the patient?

- Bleeding disorder
- Anticoagulant therapy, include medications such as warfarin, dabigatran, apixaban, rivaroxaban, and therapeutic doses of heparin and enoxaparin
- Antiplatelet medications such as clopidogrel, prasugrel or ticagrelor

**Medications Risks** (circle): Diuretics / antihypertensives / sedatives / narcotics / antipsychotics

**FWT** (circle): Nitrates / leucocytes / not done

**ASSESSMENT**

|                      |                   |      |
|----------------------|-------------------|------|
| BP lying (manual)    | Temperature       | GCS  |
| BP standing (manual) | Oxygen saturation | AMTS |
| HR                   | BGL               |      |
| RR                   | JVP               |      |

Head:

Hips:

Neck:

Legs:

Arms:

Other Injury:

**Tone**

**Muscle strength- please record +/-**

|              | R | L |          | R  | L  |
|--------------|---|---|----------|----|----|
| Normal       |   |   | Hip Flex | /5 | /5 |
| Increased    |   |   | Hip Ext  | /5 | /5 |
| Parkinsonian |   |   | Hip Abd  | /5 | /5 |
|              |   |   | Ankle PF | /5 | /5 |
|              |   |   | Ankle DF | /5 | /5 |

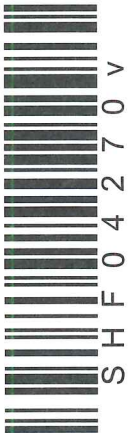



**Medical Examination**

Examine patient with particular focus on:

- Postural hypotension, neurological status, musculoskeletal and cutaneous injuries
- Symptoms of intracranial pressure such as severe headache and vomiting,
- Signs of base of skull fracture such as periorbital and mastoid ecchymosis, CSF rhinorrhoea, bleeding from the nose or ears and haemotympanum.

Unit Record Number: .....

Surname: .....

Given Name: .....

D.O.B: ..... Age: ..... Sex: .....

Address: .....

ASSESSMENT continued

**Reflexes**

**Cranial nerves—screen**

|         | R | L |              | R | L |
|---------|---|---|--------------|---|---|
| Biceps  |   |   | Pupils       |   |   |
| Br rad  |   |   | Ocular ROM   |   |   |
| Knee    |   |   | Facial droop |   |   |
| Ankle   |   |   |              |   |   |
| Plantar |   |   |              |   |   |

**Other examinations:**

Does the patient look unsafe getting into/out of bed or chair or when walking? YES / NO

**Injuries identified:**

**Risk factors identified: (please tick all relevant)**

- |                                                                        |                                               |
|------------------------------------------------------------------------|-----------------------------------------------|
| <input type="checkbox"/> Abnormal mobility (including unsteady gait)   | <input type="checkbox"/> Cognitive impairment |
| <input type="checkbox"/> Increased risk of bleeding                    | <input type="checkbox"/> Medications          |
| <input type="checkbox"/> Postural hypotension                          | <input type="checkbox"/> Previous falls       |
| <input type="checkbox"/> Abnormal neurology                            | <input type="checkbox"/> Toileting/continence |
| <input type="checkbox"/> Abnormal bone health → Vitamin D level: _____ |                                               |

REQUEST

**PLAN**

**Indications for urgent CT:**

- Unwitnessed fall and / or head strike with
  - Altered GCS
  - Suspected skull fracture
  - Signs of raised ICP, or focal neurological deficit
  - Signs of worsening confusion
  - Any loss of consciousness or amnesia post fall and are over 65 at increased risk of bleeding

**Indication for CT within 8 hours**

- Increased risk of bleeding with known or probable head strike

**Indication for coagulation check:**

- Patients on anticoagulants with a definite or probable head strike. Result must be discussed with Medical Registrar/Consultant regarding the need for reversal of anticoagulation.

**Indications for cervical spine CT (must also have a collar applied)**

- unwitnessed fall and / or head strike with any of posterior midline cervical tenderness, a focal neurological deficit, presence of a distracting injury.

**Neurological observations:**

- Unwitnessed fall or head strike
  - 15 minutes for 1 hour, then
  - Every 30 minutes for 4 hours, then review

- Patient is currently on Anticoagulant therapy, include medications such as warfarin, dabigatran, apixaban, rivaroxaban, and therapeutic doses of heparin and enoxaparin
  - 2 Hourly for 24 hours, then
  - 6 Hourly for 24 hours
- XRay (indicate body part/s for xray)
- Postural blood pressure
  - Frequency of postural blood pressure: \_\_\_\_\_
- INR
- APPT
- ECG
- MSU
- Septic screen
- Falls risk assessment (MR133) updated
- Medication review completed
- Family / NOK informed of fall and post fall management plan
- Other, specify.

- |                                             |                                                            |
|---------------------------------------------|------------------------------------------------------------|
| <input type="checkbox"/> Dandenong Hospital | <input type="checkbox"/> Monash Medical Centre Clayton     |
| <input type="checkbox"/> Kingston Centre    | <input type="checkbox"/> Moorabbin Hospital                |
| <input type="checkbox"/> Jessie McPherson   | <input type="checkbox"/> Community Health Services         |
| <input type="checkbox"/> Casey Hospital     | <input type="checkbox"/> Cranbourne Integrated Care Centre |

Unit Record Number: .....

Surname: .....

Given Name: .....

D.O.B: ..... Age: ..... Sex: .....

Address: .....

Medications to be changed: .....

Analgesia required: .....

**Interventions requested: (please tick requests)**

- |                                                                     |                                              |
|---------------------------------------------------------------------|----------------------------------------------|
| <input type="checkbox"/> line of sight                              | <input type="checkbox"/> CPO                 |
| <input type="checkbox"/> LoLoBed                                    | <input type="checkbox"/> Bed rails up / down |
| <input type="checkbox"/> Regular toileting – separate from rounding | <input type="checkbox"/> Hard Collar         |
| <input type="checkbox"/> Other .....                                |                                              |

**Follow up by Registrar:** Name: ..... Date: .....

Time: .....

**PART B: POST FALL FOLLOW UP—An interdisciplinary post fall review is to be conducted within 24 hours.**  
**Date and time of review by team:**

Review teams description of the fall (include contributing factors).

**Interventions put in place immediately post fall:**

- |                                                                    |                                            |
|--------------------------------------------------------------------|--------------------------------------------|
| <input type="checkbox"/> Line of sight                             | <input type="checkbox"/> CPO               |
| <input type="checkbox"/> LoLoBed                                   | <input type="checkbox"/> Bed rails up/down |
| <input type="checkbox"/> Regular toileting– separate from rounding | <input type="checkbox"/> Hard collar       |
| <input type="checkbox"/> Other.....                                |                                            |

Mobility assessment conducted and documented in progress notes

Falls assessment (MRI33) reviewed and updated as required

Investigations conducted and results actioned

Additional interventions put in place post interdisciplinary review:  
 .....

**Has an injury been confirmed? YES / NO. Specify injury**

**Review team in attendance (print name, position, signature)**

|                 |                       |
|-----------------|-----------------------|
| <b>MEDICAL:</b> | <b>ALLIED HEALTH:</b> |
| <b>NURSING:</b> | <b>OTHER:</b>         |

REQUEST
